# Supplementary material for: Examination of Electrolyte Replacements in the ICU Utilizing MIMIC-III Dataset Demonstrates Redundant Replacement Patterns
Source: MDPI journal article supplement (doi:10.3390/healthcare9101373), 2021-10-14

# Examination of electrolyte replacements in the ICU (MIMICIII) demonstrates significant waste and superfluous replacement patterns resulting in obscure clinical benefit

## Supplementary Materials

Mousa Ghannam <sup>1</sup>, Parasteh Malihi <sup>2</sup>, Krzysztof Laudanski<sup>3</sup>

<sup>1</sup> School of Dental Medicine, Leonard Davis Institute in Healthcare Economics, University of Pennsylvania

<sup>2</sup> School of Dental Medicine, Leonard Davis Institute in Healthcare Economics, University of Pennsylvania

<sup>3</sup> Department of Anesthesiology and Critical Care, Department of Neurology, Leonard Davis Institute in Healthcare Economics; University of Pennsylvania;

**Supplemental Table S1.** List of exclusion ICD-9 diagnoses and their codes.

| ID                       | N    | ICD codes                          |
|--------------------------|------|------------------------------------|
| Renal                    | 4973 | 189.0-997.72, E879.1, V10.52-V59.4 |
| Atrial fibrillation      | 2954 | 427.31                             |
| Acute Kidney Injury      | 2606 | 584.5-669.34                       |
| Congestive heart failure | 2272 | 398.91-428.9                       |
| Coronary Artery Disease  | 919  | 411.1- 972.4, E942.4, V45.81       |
| Packed Red Blood Cells   | 457  |                                    |
| Chronic Kidney Failure   | 319  | 585.1-585.4                        |
| End Stage Renal Disease  | 299  | 585.5-6, V45.1, V45.11, V56        |
| Paralysis                | 125  | 94.1-780.72                        |
| Rhabdomyolysis           | 114  | 728.88                             |
| Dialysis                 | 78   | V45.1-V56.0                        |
| Parathyroid Disease      | 42   | 194.1-252.9                        |
| Sarcoidosis              | 33   | 135, 321.4                         |
| Pediatrics               | 16   | N/A                                |
| Burn                     | 9    | 941.0-949.0, E890.3-E988.1         |
| Nutritional Deficiency   | 6    |                                    |

**Supplemental Table S2** Diagnoses and frequencies of the instances when over-repletion occurred.

| Electrolyte | Diagnosis                                  | N | %     |
|-------------|--------------------------------------------|---|-------|
| Potassium   | Subarachnoid Hemorrhage                    | 3 | 11.12 |
|             | Skull base fracture- coma                  | 2 | 7.41  |
|             | Coronary Atherosclerosis of Native Vessel  | 2 | 7.41  |
|             | DMI ketoacidosis, uncontrolled             | 2 | 7.41  |
|             | Intracerebral hemorrhage                   | 2 | 7.41  |
|             | Acute myocardial infarction, inferior wall | 1 | 3.71  |
|             | Anaerobic septicemia                       | 1 | 3.71  |
|             | Aortic valve disorder                      | 1 | 3.71  |
|             | Bacteremia                                 | 1 | 3.71  |
|             | Central Cord Syndrome; c5-7                | 1 | 3.71  |
| Magnesium   | Aortic Valve Disorder                      | 4 | 7.27  |
|             | Coronary Atherosclerosis of Native Vessel  | 3 | 5.50  |
|             | Mitral Valve Disorder                      | 3 | 5.50  |
|             | Anoxic Brain Damage                        | 2 | 3.63  |
|             | Asthma, unspecified, w acute exacerbation  | 2 | 3.63  |
|             | Intracerebral Hemorrhage                   | 2 | 3.63  |
|             | Septicemia, unspecified                    | 2 | 3.63  |
|             | Acute Alcohol Intoxication                 | 1 | 1.82  |
|             | Acute Alcohol Hepatitis                    | 1 | 1.82  |
|             | Acute Respiratory Failure                  | 1 | 1.82  |

**Supplemental Table S3** Diagnoses and frequencies of the instances when under-repletion occurred.

| Electrolyte | Diagnosis                                   | N    | %     |
|-------------|---------------------------------------------|------|-------|
| Potassium   | Subarachnoid Hemorrhage                     | 3076 | 13.82 |
|             | MSRA                                        | 1464 | 6.58  |
|             | Acute Pancreatitis                          | 1202 | 5.40  |
|             | Intracerebral Hemorrhage                    | 1046 | 4.70  |
|             | Poisoning by aromatic analgesics, NEC       | 771  | 3.46  |
|             | Alcohol cirrhosis liver                     | 743  | 3.34  |
|             | Septicemia, unspecified                     | 698  | 3.13  |
|             | Acute respiratory failure                   | 670  | 3.01  |
|             | Aplastic anemias NEC                        | 474  | 2.13  |
|             | Human Immunodeficiency Virus                | 445  | 2.00  |
| Magnesium   | Pneumococcal septicemia                     | 497  | 10.64 |
|             | Septicemia, unspecified                     | 306  | 6.55  |
|             | Aplastic anemias, NEC                       | 219  | 4.69  |
|             | Acute pancreatitis                          | 199  | 4.26  |
|             | Fracture, mandible body, NEC                | 193  | 4.13  |
|             | Human immunodeficiency virus                | 193  | 4.13  |
|             | Hematemesis                                 | 108  | 2.31  |
|             | Pseudomonas septicemia                      | 100  | 2.14  |
|             | Reaction to vascular device, implant, graft | 79   | 1.69  |
|             | Pseudomonal pneumonia                       | 78   | 1.67  |
| Phosphate   | Subarachnoid hemorrhage                     | 51   | 6.89  |
|             | Septicemia, unspecified                     | 41   | 5.54  |
|             | Subdural hemorrhage-coma, unspecified       | 38   | 5.14  |
|             | Other postop infection                      | 37   | 5.00  |
|             | Intracerebral hemorrhage                    | 31   | 4.19  |
|             | Acute respiratory failure                   | 26   | 3.51  |
|             | Poisoning aromatic analgesics, NEC          | 26   | 3.51  |
|             | Acute & Chronic resp fail                   | 24   | 3.24  |
|             | Acute pancreatitis                          | 24   | 3.24  |
|             | DMII ketoacidosis, uncontrolled             | 19   | 2.57  |

**Supplemental Figure S1** Top ten diagnoses when repletion was ordered when the preceding lab value was above or below the reference for potassium and magnesium.

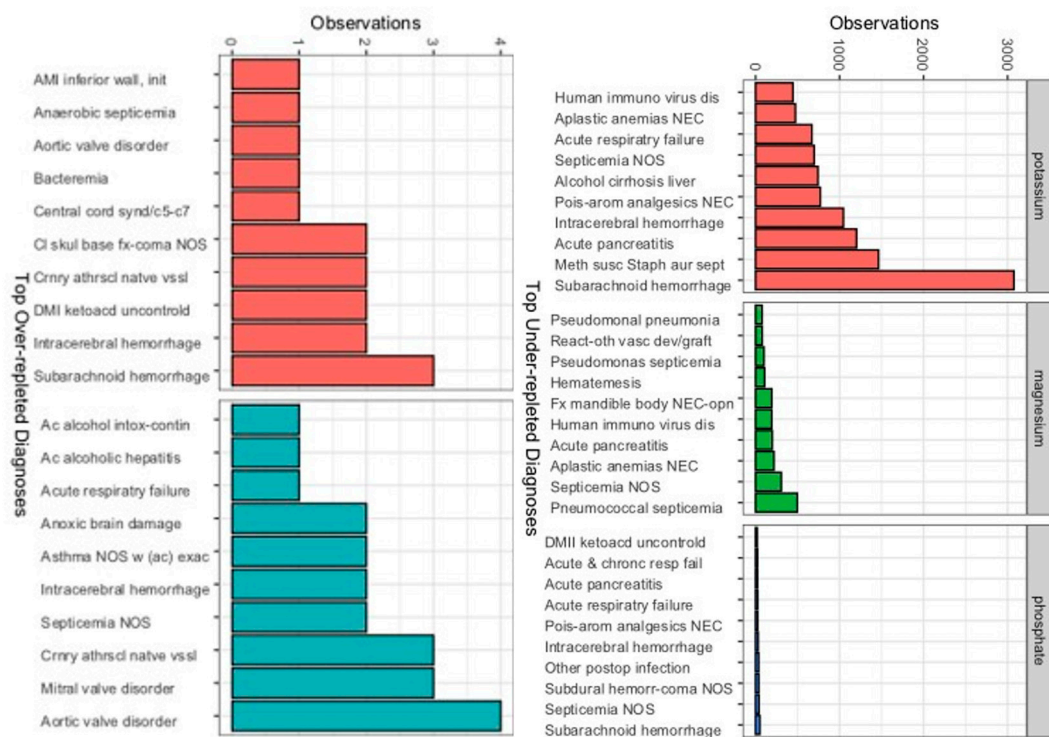

Supplement: s1 [file s1]
